# Supplementary material
Source: publisher site journal article supplement (https://www.dovepress.com/article/427698)
Supplement: Supplementary file 1 [file get_supplementary_file.php]

## Supplementary Data

**Supplementary Table 1. Adverse events in patients with UC on placebo or ozanimod 0.92 mg in the phase 2 TOUCHSTONE study<sup>1</sup>**

| <b>Event</b>                                                 | <b>Placebo<br/>(n = 65)</b> | <b>Ozanimod<br/>0.92 mg<br/>(n = 67)</b> |
|--------------------------------------------------------------|-----------------------------|------------------------------------------|
| Any AE, n (%)                                                | 26 (40)                     | 26 (39)                                  |
| Serious AE, n (%)                                            | 6 (9)                       | 3 (4)                                    |
| AE leading to discontinuation, n (%)                         | 4 (6)                       | 1 (1)                                    |
| AEs occurring in $\geq 2$ patients receiving ozanimod, n (%) |                             |                                          |
| Ulcerative colitis flare                                     | 5 (8)                       | 3 (4)                                    |
| Increased ALT                                                | 0                           | 3 (4)                                    |
| Pyrexia                                                      | 0                           | 3 (4)                                    |
| Nausea                                                       | 2 (3)                       | 2 (3)                                    |
| Arthralgia                                                   | 1 (2)                       | 2 (3)                                    |
| Rash                                                         | 0                           | 2 (3)                                    |
| Headache                                                     | 3 (5)                       | 2 (3)                                    |
| Vomiting                                                     | 0                           | 2 (3)                                    |
| Abdominal pain                                               | 1 (2)                       | 1 (1)                                    |
| Back pain                                                    | 1 (2)                       | 1 (1)                                    |
| Increased AST                                                | 0                           | 1 (1)                                    |
| Hyperbilirubinemia                                           | 0                           | 1 (1)                                    |
| Insomnia                                                     | 0                           | 1 (1)                                    |
| Proctalgia                                                   | 0                           | 1 (1)                                    |
| Anemia                                                       | 4 (6)                       | 0                                        |
| Orthostatic hypotension                                      | 0                           | 0                                        |
| Nasopharyngitis                                              | 0                           | 0                                        |

Adapted with permission from Sandborn WJ et al. *N Engl J Med.* 2016;374:1754-1762.<sup>1</sup>

Abbreviations: AE, adverse event; ALT, alanine aminotransferase; AST, aspartate aminotransferase; UC, ulcerative colitis.

**Supplementary Table 2. Pregnancies among patients with UC and MS in ozanimod clinical trials<sup>2,3</sup>**

| <b>Pregnancies, n</b>                 | <b>UC</b> | <b>MS<sup>a</sup></b> |
|---------------------------------------|-----------|-----------------------|
|                                       |           | 9                     |
| Live birth without congenital anomaly | 2         | 24 <sup>b</sup>       |
| Live birth with congenital anomaly    | 0         | 1 <sup>c</sup>        |
| Premature live birth                  | 0         | 3                     |
| Ongoing                               | 2         | 2                     |
| Spontaneous early loss                | 2         | 7 <sup>b</sup>        |
| Elective termination <sup>d</sup>     | 3         | 9                     |
| No information                        | 0         | 2                     |

<sup>a</sup>Pregnancy numbers are higher for MS compared with UC due to a different patient population profile and longer study duration. <sup>b</sup>A total of 48 MS births resulted from 47 pregnancies because a twin pregnancy led to 1 live birth and 1 early loss. <sup>c</sup>Duplex kidney. <sup>d</sup>First trimester; none were due to known congenital anomaly.

Abbreviations: MS, multiple sclerosis; UC, ulcerative colitis.

**Supplementary Table 3.** Guidance on switching from other UC therapies to ozanimod

| <b>Current treatment</b>               | <b>Event leading to treatment switch</b>                                                                                              | <b>Reason to switch to ozanimod</b>                                                                                         |
|----------------------------------------|---------------------------------------------------------------------------------------------------------------------------------------|-----------------------------------------------------------------------------------------------------------------------------|
| Any UC therapy                         | Loss of response<br><br>MS diagnosis                                                                                                  | Ozanimod may be efficacious given its novel mechanism of action<br><br>Ozanimod is also indicated for relapsing forms of MS |
| Anti-TNFs                              | Anti-TNF–induced lupoid reaction or anti-TNF–induced palmoplantar pustulosis <sup>4-6</sup>                                           | Lupoid reaction and palmoplantar pustulosis not reported with non–anti-TNF drugs                                            |
| Anti-TNFs, vedolizumab, or ustekinumab | Infusion/injection-related adverse reaction <sup>4-8</sup> or patient aversion to needles                                             | Ozanimod is administered orally                                                                                             |
| JAK inhibitors                         | Risk of adverse events based on the boxed warning for serious infections, mortality, malignancy, MACE, and thrombosis <sup>9,10</sup> | Ozanimod’s favorable safety profile with no boxed warnings                                                                  |

Abbreviations: JAK, Janus kinase; MACE, major adverse cardiovascular events; MS, multiple sclerosis; TNF, tumor necrosis factor; UC, ulcerative colitis.

## References

1. Sandborn WJ, Feagan BG, Wolf DC, et al. Ozanimod induction and maintenance treatment for ulcerative colitis. *N Engl J Med*. 2016;374(18):1754-1762
2. Afsari S, Henry A, Comi G, et al. Pregnancy outcomes in the ozanimod clinical development program in relapsing multiple sclerosis, ulcerative colitis, and Crohn's disease [poster]. Presented at: Annual Meeting of the Consortium of Multiple Sclerosis Centers; October 25–28, 2021; Orlando, FL
3. Dubinsky MC, Mahadevan U, Charles L, et al. Pregnancy outcomes in the ozanimod clinical development program in relapsing multiple sclerosis, ulcerative colitis, and Crohn's disease [abstract DOP53]. *J Crohns Colitis*. 2021;15(Supplement\_1):S088-S089.
4. Humira [package insert]. North Chicago, IL: Abbott Laboratories (AbbVie); 2021.
5. Enbrel [package insert]. Thousand Oaks, CA, USA: Immunex Corporation; 2022.
6. Remicade [package insert]. Horsham, PA: Janssen Biotech, Inc.; 2021.
7. Entyvio [package insert]. Deerfield, IL: Takeda Pharmaceuticals America, Inc.; 2022.
8. Stelara [package insert]. Horsham, PA: Janssen Biotech, Inc.; 2022.
9. Xeljanz [package insert]. New York, NY: Pfizer Labs; 2022.
10. Rinvoq [package insert]. North Chicago, IL, USA: AbbVie, Inc.; 2022.
